# Supplementary material
Source: MDPI journal article supplement (https://www.mdpi.com/2504-477X/6/8/226)
Supplement: s1 [file s1]

# Impact of Dialysis Clinical Operating Conditions on Human Serum Protein-mediated Inflammatory Biomarkers Released in Patients Using Polyarylethersulfone Membranes

Heloisa Westphalen<sup>1</sup>, Shaghayegh Saadati<sup>1,2</sup>, Jumanah Bahig<sup>2,3</sup>, Huu Doan<sup>4</sup>, Ahmed Shoker<sup>5,6</sup>, Amira Abdelrasoul<sup>1,2\*</sup>

<sup>1</sup>Department of Chemical and Biological Engineering, University of Saskatchewan, 57 Campus Drive, Saskatoon, Saskatchewan, S7N 5A9, Canada

<sup>2</sup>Division of Biomedical Engineering, University of Saskatchewan, 57 Campus Drive, Saskatoon, Saskatchewan, S7N 5A9, Canada

<sup>3</sup>Kinesiology, University of Saskatchewan, 87 Campus Dr, Saskatoon, Saskatchewan, S7N 5B, Canada.

<sup>4</sup>Department of Chemical Engineering, Toronto Metropolitan University, 350 Victoria St., Toronto, ON M5B 2K3, Canada

<sup>5</sup>Nephrology Division, College of Medicine, University of Saskatchewan, 107 Wiggins Rd, Saskatoon, Saskatchewan, S7N 5E5, Canada

<sup>6</sup>Saskatchewan Transplant Program, St. Paul's Hospital, 1702 20th Street West, Saskatoon, Saskatchewan, S7M 0Z9, Canada

**\*Corresponding Author: amira.abdelrasoul@usask.ca, Tel: (306) 966 2946, Fax: (306) 966 4777**

## SUPPORTING INFORMATION

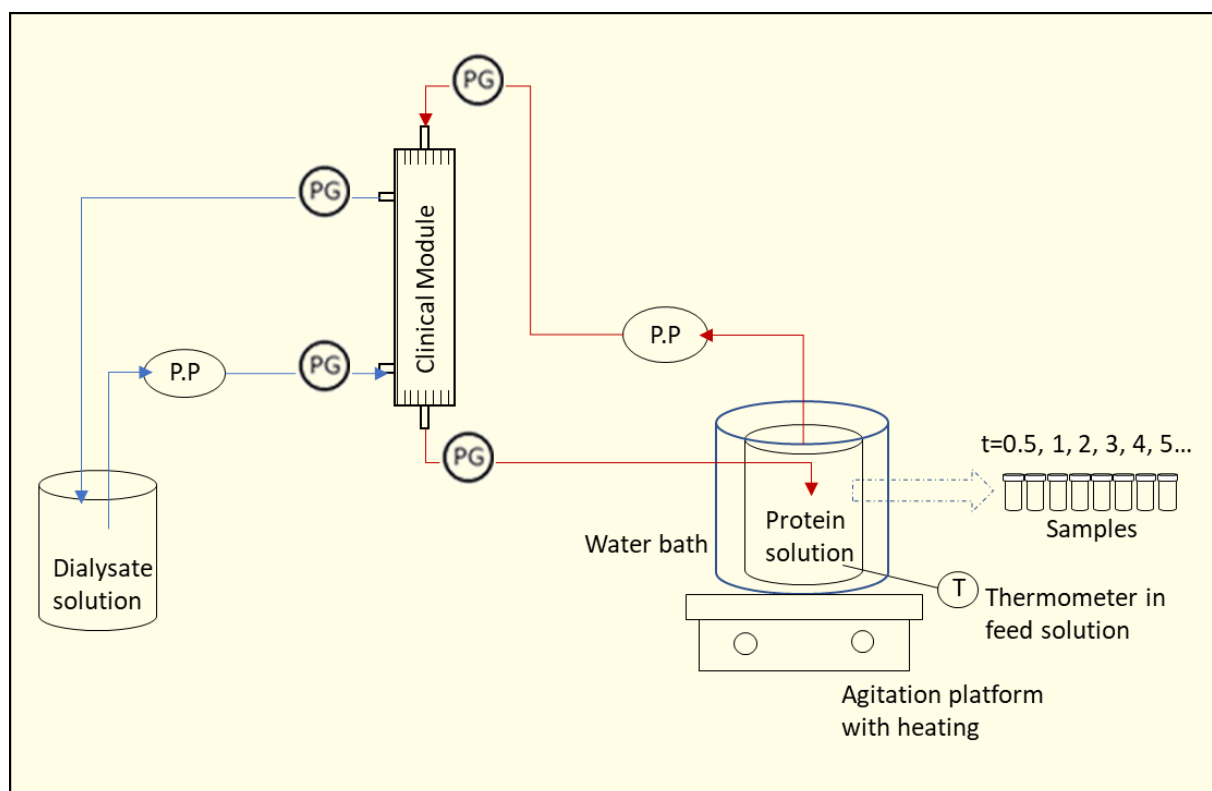

**Figure S1.** Experimental setup for *in-vitro* FB adsorption.

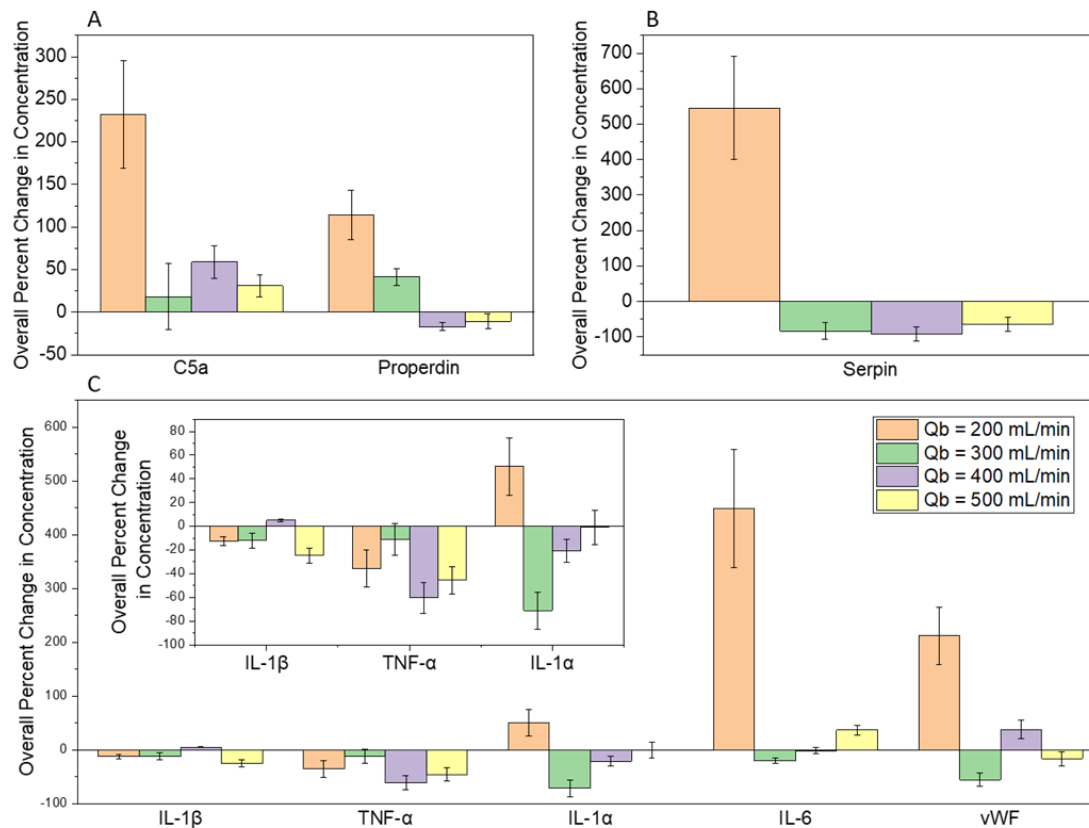

**Figure S2.** Overall percent change in concentration of (A) C5a, properdin; (B) Serpin and (C) TNF- $\alpha$ , IL-1 $\alpha$ , IL-1 $\beta$ , IL-6, and vWF in patients treated with different values of Qb (Qd=500 mL/min)

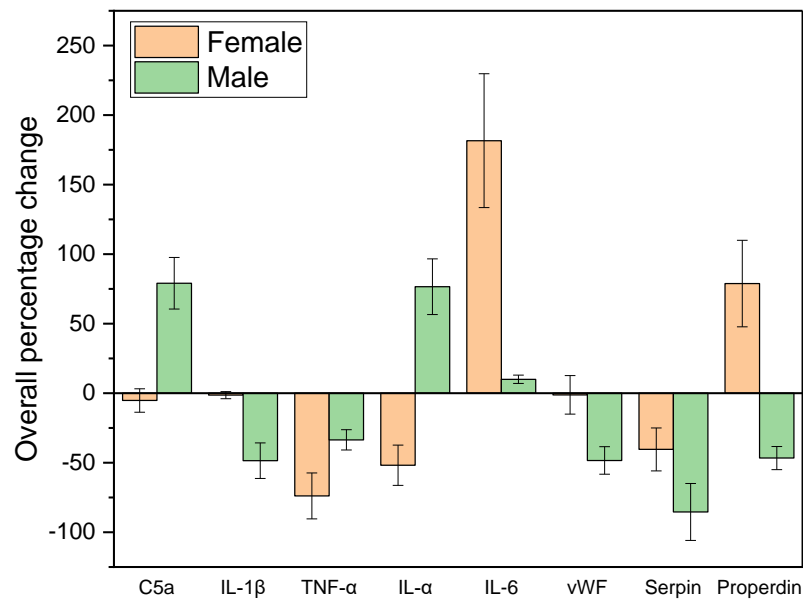

**Figure S3.** Overall percent change in concentration of inflammatory biomarkers for female and male patients (Qb=500 mL/min)

**Table S1.** Shapiro-Wilk normality test results

|               | Statistic | p-value | Decision at level(5%)  |
|---------------|-----------|---------|------------------------|
| C5a           | 0.91051   | 0.47068 | Can't reject normality |
| IL-1 $\beta$  | 0.94231   | 0.68234 | Can't reject normality |
| TNF- $\alpha$ | 0.81521   | 0.10718 | Can't reject normality |
| IL-1 $\alpha$ | 0.93367   | 0.62161 | Can't reject normality |
| IL-6          | 0.90752   | 0.45285 | Can't reject normality |
| vWF           | 0.9558    | 0.77846 | Can't reject normality |
| Serpin        | 0.81511   | 0.10699 | Can't reject normality |
| Properdin     | 0.9506    | 0.7415  | Can't reject normality |

**Table S2.** Surface roughness measurements for hollow polymer membrane fibers

| Parameters                                          | PAES-PVP                                  |                                                |
|-----------------------------------------------------|-------------------------------------------|------------------------------------------------|
|                                                     | Inside<br>(2 $\times$ 2 $\mu$ m)<br>(n=3) | Outside<br>(1.5 $\times$ 1.5 $\mu$ m)<br>(n=4) |
| Membrane average roughness; $R_a$ (nm)              | 10.4 $\pm$ 4.0                            | 10.5 $\pm$ 5.0                                 |
| Membrane root mean square roughness; $R_{RMS}$ (nm) | 15.3 $\pm$ 5.9                            | 15.4 $\pm$ 6.8                                 |
